# Supplementary material
Source: PubMed Central journal article supplement (PMC5793683)
Supplement: asw071_supp.pdf [file asw071_supp.pdf]

# Supplementary material for ‘Generalized R-squared for detecting dependence’

BY X. WANG

Department of Statistics, Harvard University, Cambridge, Massachusetts 02138, U.S.A  
xufeiwang@fas.harvard.edu

5

B. JIANG

Two Sigma Investments, Limited Partnership, New York, New York 10013, U.S.A  
bojiang83@gmail.com

AND J. S. LIU

Department of Statistics, Harvard University, Cambridge, Massachusetts 02138, U.S.A  
jliu@stat.harvard.edu

10

## SUMMARY

This document contains Supplementary Material on the following topics: (1) software implementation; (2) relationship between G-squared and segmented regression; (3) equitability study; (4) more simulations; (5) proof of the consistency of  $G_m^2$  and  $G_t^2$  for estimating the G-squared; (6) proof of the equivalence between  $G_m^2$  and  $R^2$  in the bivariate normal case.

15

## 1. SOFTWARE IMPLEMENTATION

We provide R implementation to estimate  $G_m^2$  and  $G_t^2$  discussed in the main paper. The R package is available at <http://www.people.fas.harvard.edu/~junliu/Gs>. We studied the computing time for different methods with sample sizes  $n = 50, 100, 225$  and  $500$ . For each  $n$  we simulated 1,000 observations and recorded the computing time for every method; the average time is shown in Fig 1. The computing time for  $G_t^2$  was twice as much as the computing time for  $G_m^2$  due to the normalizing constant. This time can be further reduced by tabulating the normalizing constant for pairs of  $(n, \lambda_0)$ .  $G_m^2$  and  $G_t^2$  were more time efficient compared with distance correlation, the method of Heller et al. (2016), and  $MIC_e$ .

20

25

## 2. SEGMENTED REGRESSION

The R-squared for segmented regression with predictor  $X$  and response  $Y$  is

$$R^2 = 1 - \frac{\sum_{h=1}^K n_h \hat{\sigma}_h^2}{n \hat{\nu}^2},$$

where  $\hat{\nu}^2$  is the sample variance of  $Y$ ,  $n_h$  and  $\hat{\sigma}_h^2$  are sample size and residual variance of  $Y$  after regressing on  $X$  in segment  $h$  ( $h = 1, \dots, K$ ).  $R^2$  can be viewed as an estimator of

$$R_{Y|X}^2 = 1 - E\{\text{var}(Y | X)\}/\text{var}(Y);$$

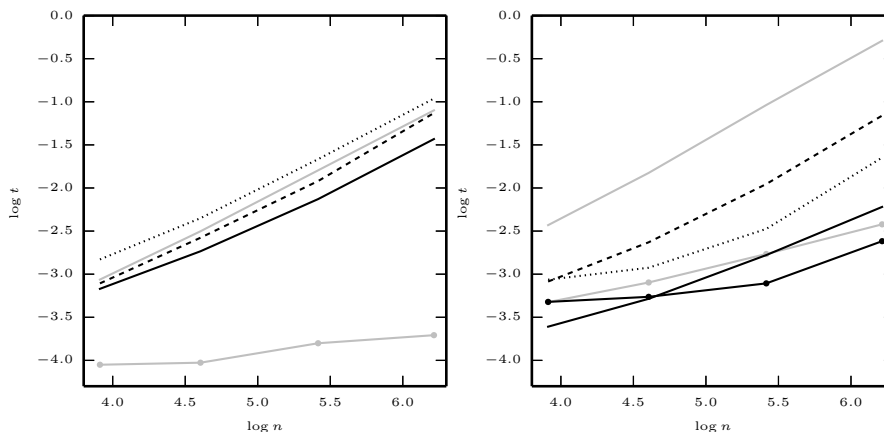

Fig. 1. The left figure shows the average computing time of  $G_m^2$  (black solid),  $G_t^2$  (grey solid), Pearson correlation (grey markers), distance correlation (black dashes) and the method of Heller et al. (2016) (black dots) for 1,000 simulations with sample sizes  $n = 50, 100, 225$  and  $500$ ; the right figure shows the average computing time of mutual information (black solid),  $MIC_e$  (grey solid), alternating conditional expectation (grey markers), characteristic function (black dashes), Genest's test (black dots) and Hoeffding's test (black markers). The x-axis is the logarithm of  $n$  with base 10 and the y-axis is the logarithm of the computing time in seconds with base 10.

30 it is zero if and only if  $E(Y | X)$  is a constant.  $G_{Y|X}^2$  equals

$$1 - \exp [E\{\log \text{var}(Y | X)\} - \log \text{var}(Y)];$$

it is zero if and only if both  $E(Y | X)$  and  $\text{var}(Y | X)$  are constant.  $G_{Y|X}^2$  equals  $R_{Y|X}^2$  when  $\text{var}(Y | X)$  is a constant, but  $G_{Y|X}^2$  is more general than  $R_{Y|X}^2$  since it can capture heteroscedastic effects.

Given a fixed number of segments  $K$ , computing  $R_{Y|X}^2$  with the optimal segmentation is  
 35 more computationally intensive than computing  $G_m^2$  and  $G_t^2$ , especially when  $K$  is large. When  $K$  is unknown, we can apply the same dynamic programming algorithm for  $G_m^2$  or  $G_t^2$  and fit a penalized version of the segmented regression to avoid over-fitting. If we also require that the fitted curve be continuous, no exact numerical solution is available; we could potentially design a Markov chain Monte Carlo algorithm under a Bayesian framework.

### 40 3. EQUITABILITY

Reshef et al. (arXiv:1505.02212) gave two equivalent definitions for the equitability of a statistic that measures dependence. Intuitively, equitable statistics can be used to gauge the degree of dependence. They used  $\Psi = \text{cor}^2\{Y, f(X)\}$  to define the degree of dependence when the dependence of  $Y$  on  $X$  can be described by a functional relationship. When  $\text{var}(Y | X)$  is a constant,  
 45 we have  $\Psi \equiv G_{Y|X}^2$ . For a perfectly equitable statistic, its sampling distribution should be almost identical for different relationships with the same  $\Psi$ . But the existence of such a statistic for any well-defined large class of functional relationships remains unclear.

We repeated the equitability study by Reshef et al. (2011). Figure 2 shows the 95% confidence bands for  $G_m^2$  and  $G_t^2$ , compared with alternating conditional expectation, Pearson correlation,  
 50 distance correlation, and  $MIC_e$  for  $X \sim N(0, 1)$  and

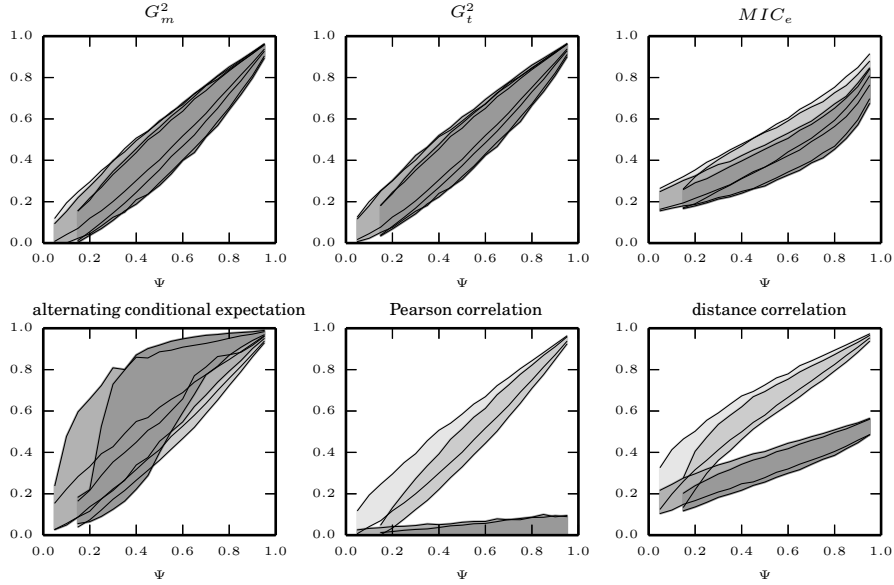

Fig. 2. The plots from the top left to the bottom right are the 95% confidence bands of  $\Phi$  for the 6 indicated methods. We chose  $n = 225$  and performed 1,000 replications for each relationship and each value of  $\Psi$  for Example 1–4. The shadow is the lightest for Example 1 and darkest for Example 4.  $\Psi$  is a monotone function of the signal-to-noise ratio when the error variance is constant. The y-axis shows the values of the corresponding statistic, each estimating its own population mean, which may or may not be  $\Psi$ .

*Example 1.*  $Y = X + \epsilon\sigma$  and  $\epsilon \sim N(0, 1)$ ;

*Example 2.*  $Y = X + \epsilon\sigma$  and  $\epsilon \sim N(0, e^{-|X|})$ ;

*Example 3.*  $Y = X^2/\sqrt{2} + \epsilon\sigma$  and  $\epsilon \sim N(0, 1)$ ;

*Example 4.*  $Y = X^2/\sqrt{2} + \epsilon\sigma$  and  $\epsilon \sim N(0, e^{-|X|})$ .

We chose different values of  $\Psi$  with  $n = 225$  and conducted 1,000 replications for each case. The plots show that  $G_m^2$  and  $G_t^2$  increased along with  $\Psi$  for all relationships, as expected, and that the confidence bands obtained under different functional relationships had a similar size and location for the same  $\Psi$ . The confidence bands were also comparably narrow. The  $MIC_e$  displayed good equitability, though slightly worse than  $G_m^2$  and  $G_t^2$ , while the other three statistics did poorly for non-monotone relationships. The alternating conditional expectation tended to have a wider confidence band for Example 3 and 4 than the other methods, while the Pearson correlation and distance correlation had non-overlapping confidence intervals for different relationships when  $\Psi$  is moderately large. In other words, the Pearson correlation and distance correlation can yield drastically different values for two relationships with the same  $\Psi$ . This phenomenon was as expected, since it is known that these two statistics do not perform well for non-monotone relationships.

An alternative strategy to study equitability of a statistic is to test  $\mathcal{H}_0 : \Psi = x_0$  against  $\mathcal{H}_1 : \Psi = x_1$  ( $x_1 > x_0$ ) for a broad set of functional relationships using the statistic. The more powerful a test statistic for all types of relationships, the better its equitability. For each aforementioned method, we performed right-tailed tests with the type-I error fixed at  $\alpha = 0.05$  and different combinations of  $(x_0, x_1)$  ( $0 < x_0 < x_1 < 1$ ). Given a fixed sample size, a perfectly equitable

Table 1. *Functional relationships for equitability study*

| Relation Name                 | Function                                                                                   |
|-------------------------------|--------------------------------------------------------------------------------------------|
| line                          | $x$                                                                                        |
| quadratic                     | $(x - 1/2)^2$                                                                              |
| cubic                         | $4(2.4x - 1.3)^3 + (2.4x - 1.3)^2 - 4(2.4x - 1.3)$                                         |
| exponential ( $10^x$ )        | $10^{10x}$                                                                                 |
| exponential ( $2^x$ )         | $2^{2x}$                                                                                   |
| L-shaped                      | $(x/99)I_{x \leq 0/99} + 1I_{x > 0.99}$                                                    |
| lopsided L-shaped             | $200xI_{x \leq 0.005} + (-198x + 19.9)I_{0.005 < x \leq 0.01} + (-x/99 + 1/99)I_{x > 0.1}$ |
| spike                         | $20I_{x \leq 0.05} + (-18x + 1.9)I_{0.05 < x \leq 0.1} + (-x/9 + 1/9)I_{x > 0.1}$          |
| sigmoid                       | $\{50(x - 0.5) + 0.5\}I_{0.49 < x \leq 0.51} + 1I_{x > 0.51}$                              |
| linear + high freq periodic   | $0.1 \sin\{10.6(2x - 1)\} + 1.1(2x - 1)$                                                   |
| linear + high freq periodic 2 | $0.2 \sin\{10.6(2x - 1)\} + 1.1(2x - 1)$                                                   |
| linear + low freq periodic    | $0.2 \sin\{4(2x - 1)\} + 1.1(2x - 1)$                                                      |
| linear + medium freq periodic | $\sin(10\pi x) + x$                                                                        |
| high freq sine                | $\sin(8\pi x)$                                                                             |
| non-Fourier freq sine         | $\sin(9\pi x)$                                                                             |
| very high freq sine           | $\sin(16\pi x)$                                                                            |
| varying freq sine             | $\sin\{6\pi x(1 + x)\}$                                                                    |
| high freq cosine              | $\cos(14\pi x)$                                                                            |
| non-Fourier freq cosine       | $\cos(7\pi x)$                                                                             |
| varying freq cosine           | $\sin\{5\pi x(1 + x)\}$                                                                    |

statistic should yield the same power for all kinds of relationships so that it is able to reflect the degree of dependency by a single value regardless of the type of relationship. In reality, most statistics can perform well only for a small class of relationships. We use a heat map to demonstrate the average power of a test statistic with different pairs of  $(x_0, x_1)$  ( $0 < x_0 < x_1 < 1$ ) in Fig. 3. Each dot in the plot represents the average power of a test statistic over a class of functional relationships; the darker the color, the higher the power. We simulated  $(X, Y)$  with the following model

$$X \sim U(0, 1), Y = f(X) + \epsilon\sigma, \epsilon \sim N(0, 1).$$

The twenty chosen functional relationships, which were inspired by the functional relationships in (Reshef et al., arXiv:1505.02214), are shown in Table 1. We carried out the testing for  $(x_0, x_1) = (i/50, j/50)$  ( $i < j = 1, \dots, 49$ ). We set  $n = 225$  and conducted 1,000 replications for each relationship and each pair of  $(x_0, x_1)$  ( $0 < x_0 < x_1 < 1$ ). For any method with a tuning parameter, we chose parameters that resulted in the greatest average power. We observed that  $G_m^2$ ,  $G_t^2$  and  $MIC_e$  had the best equitability, followed by alternating conditional expectation and  $TIC_e$ . The average powers for  $G_m^2$ ,  $G_t^2$  and  $MIC_e$  over the entire range of  $(x_0, x_1)$  ( $0 < x_0 < x_1 < 1$ ) were all 0.6, although  $G_m^2$  and  $G_t^2$  were slightly better for larger  $x_0$ 's. Besides, using our empirical Bayes method to select  $\lambda_0$ , the equitability of  $G_m^2$  and  $G_t^2$  can be further improved. In comparison, all the remaining methods were not as equitable.

## 4. SIMULATIONS

### 4.1. Consistency of $G_m^2$ and $G_t^2$

For a general relationship, the true value of  $G^2$  is nontrivial to compute. However, we can calculate  $G_{Y|X}^2$  for some special examples and evaluate the sum of squared errors of the estimators.

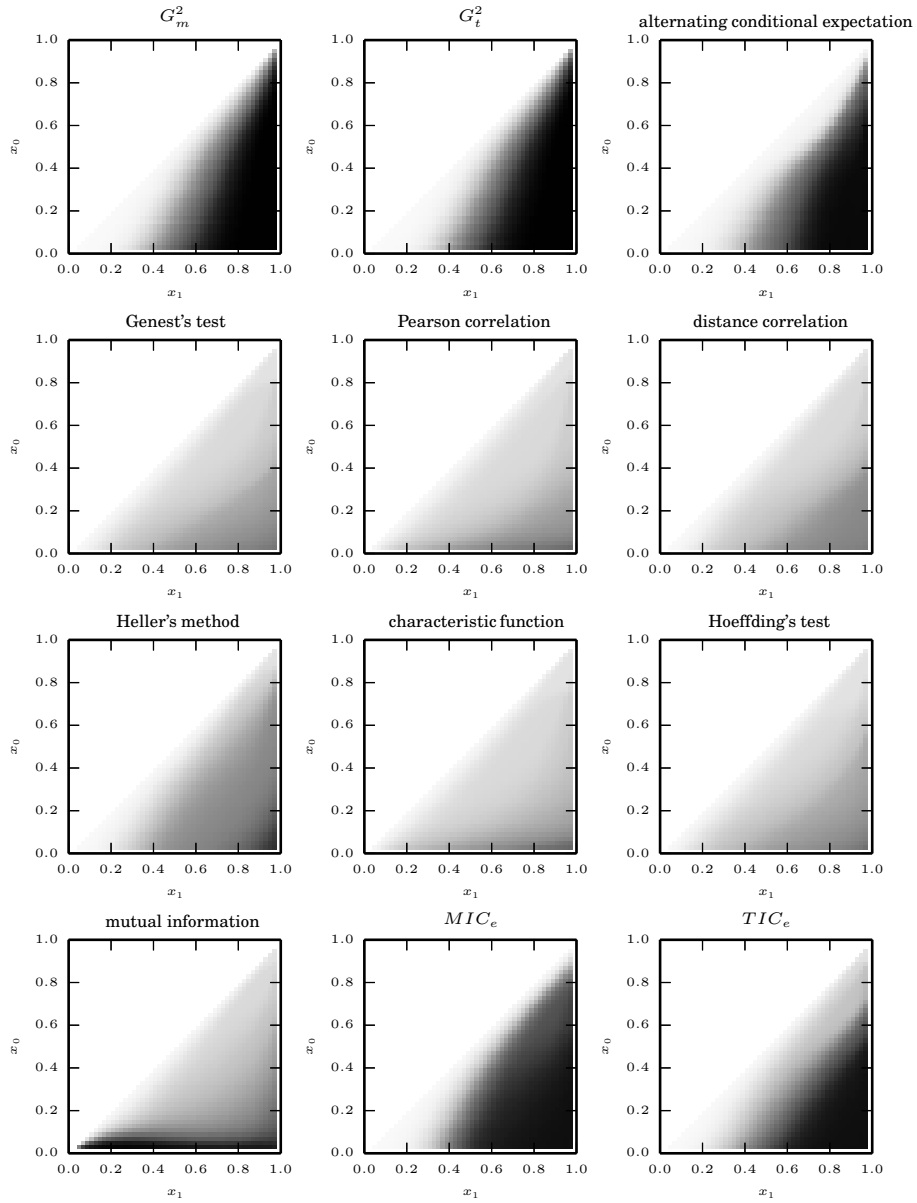

Fig. 3. Heat maps for the equitability of different methods. Each gray dot corresponding to  $(x_1, x_0)$  ( $0 < x_0 < x_1 < 1$ ) represents the power of the method for testing  $\mathcal{H}_0 : \Psi = x_0$  against  $\mathcal{H}_1 : \Psi = x_1$ , averaging over a class of functions. The darker a dot, the higher the average power. We chose sample size  $n = 225$  and performed 1,000 replications for each relationship and pair of  $(x_0, x_1)$  ( $0 < x_0 < x_1 < 1$ ).

The introduction of the working model provides a simple and intuitive derivation of  $G_{Y|X}^2$ . With  $X \sim U(0, 1)$ , we consider Example 1–4 and

*Example 5.*  $Y = X + \epsilon\sigma$  and  $\epsilon \sim \sqrt{3}U(-1, 1)$ ;

*Example 6.*  $Y = X + \epsilon\sigma$  and  $\epsilon \sim \sqrt{3}e^{-|X|}U(-1, 1)$ ;

Table 2. Sum of squared errors for  $G_m^2$  and  $G_t^2$  with increasing  $n$

|     |       | $G_m^2$ |       |       |       | $G_t^2$ |       |       |  |
|-----|-------|---------|-------|-------|-------|---------|-------|-------|--|
| n   | ex. 1 | ex. 2   | ex. 3 | ex. 4 | ex. 1 | ex. 2   | ex. 3 | ex. 4 |  |
| 100 | 5.11  | 4.56    | 19.27 | 16.45 | 4.99  | 3.56    | 13.15 | 11.53 |  |
| 225 | 2.37  | 2.56    | 9.30  | 7.55  | 2.39  | 1.88    | 6.41  | 5.37  |  |
| 400 | 1.35  | 1.42    | 5.17  | 4.16  | 1.35  | 1.05    | 3.67  | 3.04  |  |

  

|     |       | $G_m^2$ |       |       |       | $G_t^2$ |       |       |  |
|-----|-------|---------|-------|-------|-------|---------|-------|-------|--|
| n   | ex. 5 | ex. 6   | ex. 7 | ex. 8 | ex. 5 | ex. 6   | ex. 7 | ex. 8 |  |
| 100 | 4.87  | 4.10    | 20.29 | 17.29 | 5.56  | 3.12    | 13.45 | 11.73 |  |
| 225 | 2.29  | 2.43    | 9.05  | 8.98  | 2.76  | 1.77    | 6.13  | 6.42  |  |
| 400 | 1.49  | 1.49    | 5.38  | 4.82  | 1.93  | 1.08    | 3.78  | 3.46  |  |

*Example 7.*  $Y = X^2/\sqrt{2} + \epsilon\sigma$  and  $\epsilon \sim \sqrt{3}U(-1, 1)$ ;

*Example 8.*  $Y = X^2/\sqrt{2} + \epsilon\sigma$  and  $\epsilon \sim \sqrt{3}e^{-|X|}U(-1, 1)$ .

For Example 1, 3, 5, and 7,  $G_{Y|X}^2$  is  $(1 + \sigma^2)^{-1}$ ; for Example 2, 4, 6 and 8,  $G_{Y|X}^2$  is  $(1 + 0.07\sigma^2)(1 + 0.52\sigma^2)^{-1}$ . We chose  $\sigma = 1$  and simulated 1,000 replications for each model and sample size and used  $\lambda_0 = 3$  for  $G_m^2$  and  $G_t^2$ . Table 2 shows the sum of squared errors of  $G_m^2(Y | X, \lambda_0)$  and  $G_t^2(Y | X, \lambda_0)$  for the different models as  $n$  varies. We found that the sum of squared errors decreased roughly in the order of  $n^{-1}$  for both estimators and that  $G_t^2$  appeared slightly more accurate. The sum of squared errors were similar when the function relationships were the same, regardless of the error type. This confirmed that the estimation accuracies of  $G_m^2$  and  $G_t^2$  are not sensitive to the Gaussian assumption.

#### 4.2. More simulations for power analysis

Table 3 lists twenty functional relationships for power analysis. For all relationships, we normalize them so that  $\text{var}\{f(X)\} = 1$  with  $X \sim U(0, 1)$ . As an intuitive presentation, Figure 4 shows the twenty simulated relationships with  $G_{Y|X}^2 = 0.8$ . The power analysis results with six methods for the first eight relationships were in the main paper. Figure 5 presents the power for the eight relationships with the remaining six methods. The power analysis of the remaining twelve relationships with the entire twelve methods are in Figures 6–8. Figures 7 and 8 have the same legend as Figure 6. We found  $G_m^2$  and  $G_t^2$  were among the most powerful test statistics and  $G_t^2$  showed a higher power than  $G_m^2$  in most examples.

#### 4.3. Influence of sample size

We ran simulations with the same setup with  $n = 50, 100, 225$  and  $500$ . Figure 9 shows the average power of  $G_m^2, G_t^2$ , the Pearson correlation, the distance correlation, the method of Heller et al. (2016) and  $\text{TIC}_e$  against different sample sizes. We found that  $G_m^2$  and  $G_t^2$  were among the most powerful methods when  $n$  is larger than 100. When the sample size is small, the powers of  $G_m^2$  and  $G_t^2$  were slightly lower than that of Heller et al. (2016) in some cases but were still among the most powerful methods. Power analysis for more relationships are in Fig. 10–12.

#### 4.4. Simulation for the empirical Bayes selection of $\lambda_0$

We examined the distributions of  $G_m^2(\lambda_0)$  and  $G_t^2(\lambda_0)$  with  $\lambda_0 = 0.5, 1.5, 2.5$  and  $3.5$  for  $X \sim N(0, 1)$  and

*Example 9.*  $Y = X + \sigma\epsilon$  and  $\epsilon \sim N(0, 1)$ .

*Example 10.*  $Y = \sin(4\pi x)/0.7 + \sigma\epsilon$  and  $\epsilon \sim N(0, 1)$ .

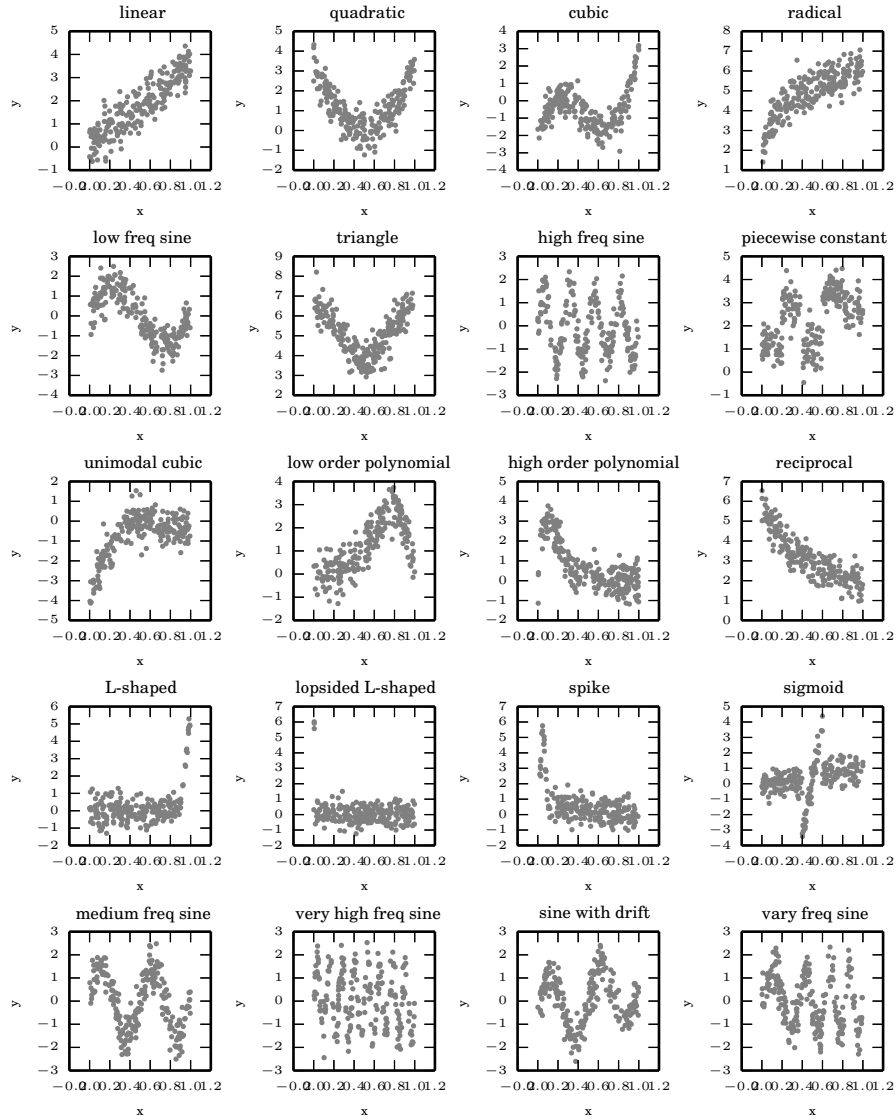

Fig. 4. Scatter plots for the twenty functional relationships in Table 3 with  $n = 225$ . We chose  $\sigma = 0.5$  for each relationship and  $G_{Y|X}^2 = 0.8$ .

Similar to Section 2.5 of the main paper, we chose  $n = 225$  and computed  $G_m^2$  and  $G_t^2$  with data-driven  $\lambda_0$ . For each model we performed 1,000 replications and chose  $\sigma = 9.95$  so that  $G_{Y|X}^2 = 0.01$ . Figure 13 presents the same analysis as Figure 1 of the main paper but here  $X$  and  $Y$  were almost independent. A larger  $\lambda_0$  was preferable for both models; this is because a small  $\lambda_0$  tended to use more slices than necessary. The data-driven  $\lambda_0$  still gave the most accurate estimates of the  $G_{Y|X}^2$ . Consistency of the data-driven estimators is proven in Section 5.2.

Table 3. *Functional relationships for power analysis*

| Relation Name         | Function                                                                                                                          |
|-----------------------|-----------------------------------------------------------------------------------------------------------------------------------|
| linear                | $x$                                                                                                                               |
| quadratic             | $(x - 1/2)^2$                                                                                                                     |
| cubic                 | $32(x - 1/3)^3 - 12(x - 1/3)^2 - 3(x - 1/3)$                                                                                      |
| radical               | $x^{0.25}$                                                                                                                        |
| low freq sine         | $\sin(2\pi x)$                                                                                                                    |
| triangle              | $(1 - x)I_{x < 0.5} + xI_{x \geq 0.5}$                                                                                            |
| high freq sine        | $\sin(8\pi x)$                                                                                                                    |
| piecewise constant    | $0.287I_{x \leq 0.2} + 0.796I_{0.2 < x \leq 0.4} + 0.290I_{0.4 < x \leq 0.6}$<br>$+ 0.924I_{0.6 < x \leq 0.8} + 0.717I_{x > 0.8}$ |
| unimodal cubic        | $32(x - 2/3)^3 - 12(x - 2/3)^2 - 3(x - 2/3)$                                                                                      |
| low order polynomial  | $x^4(1 - x)$                                                                                                                      |
| high order polynomial | $x(1 - x)^9$                                                                                                                      |
| reciprocal            | $1/(x + 0.5)$                                                                                                                     |
| L-shaped              | $(x/90)I_{x \leq 0.9} + (90x - 81)I_{x > 0.9}$                                                                                    |
| lopsided L-shaped     | $200xI_{x \leq 0.005} + (-198x + 19.9)I_{0.005 < x \leq 0.01} + (-x/99 + 1/99)I_{x > 0.1}$                                        |
| spike                 | $20xI_{x \leq 0.05} + (-18x + 1.9)I_{0.05 < x \leq 0.1} + (-x/9 + 1/9)I_{x > 0.1}$                                                |
| sigmoid               | $\{50(x - 0.5) + 0.5\}I_{0.4 < x \leq 0.6} + I_{x > 0.6}$                                                                         |
| medium freq sine      | $\sin(4\pi x)$                                                                                                                    |
| very high freq sine   | $\sin(16\pi x)$                                                                                                                   |
| sine with drift       | $\sin\{2\pi(2x - 1)\} + (2x - 1)/2$                                                                                               |
| vary freq sine        | $\sin\{4\pi x(1 + x)\}$                                                                                                           |

## 5. PROOFS

5.1. *Proof of Theorem 1 - consistency*

The following lemma is needed for the main theorem.

LEMMA 1. *Suppose  $X$  and  $Y$  are univariate continuous random variables with  $|X|, |Y| < B$  and  $\text{var}(Y) > b^{-2}$ . Given  $n$  observations  $(x_i, y_i)$  ( $i = 1, \dots, n$ ) and let  $\hat{\sigma}^2$  be the residual variance after regressing  $Y$  on  $X$ . Then,*

$$\text{pr} \left[ \left| \hat{\sigma}^2 - \left\{ \text{var}(Y) - \frac{\text{cov}^2(X, Y)}{\text{var}(X)} \right\} \right| > \epsilon \right] \leq 10e^{-C(B, b)n\epsilon^2}$$

with  $C(B, b) = (288b^2B^4)^{-1} \min\{1, (4b^2B^2)^{-1}\}$  and  $\epsilon > 0$  small enough.

*Proof of Lemma 1.* Without loss of generality, we assume  $E(X) = E(Y) = 0$ ,  $\text{var}(X) = \text{var}(Y) = 1$  and  $E(XY) = \rho$ . By definition

$$\hat{\sigma}^2 = \frac{1}{n} \sum_{i=1}^n y_i^2 - \left( \frac{1}{n} \sum_{i=1}^n y_i \right)^2 - \frac{\left\{ \frac{1}{n} \sum_{i=1}^n x_i y_i - \left( \frac{1}{n} \sum_{i=1}^n x_i \right) \left( \frac{1}{n} \sum_{i=1}^n y_i \right) \right\}^2}{\frac{1}{n} \sum_{i=1}^n x_i^2 - \left( \frac{1}{n} \sum_{i=1}^n x_i \right)^2}.$$

Then  $x_i^2, y_i^2 \in [0, B^2]$ ,  $x_i y_i \in [-B^2, B^2]$ . According to Hoeffding's inequality,

$$\begin{aligned} & \text{pr} \left( \left| \frac{1}{n} \sum_{i=1}^n x_i \right| > \epsilon/6 \right), \quad \text{pr} \left( \left| \frac{1}{n} \sum_{i=1}^n y_i \right| > \epsilon/6 \right), \quad \text{pr} \left( \left| \frac{1}{n} \sum_{i=1}^n x_i^2 - 1 \right| > \epsilon/6 \right), \\ & \text{pr} \left( \left| \frac{1}{n} \sum_{i=1}^n y_i^2 - 1 \right| > \epsilon/6 \right), \quad \text{pr} \left( \left| \frac{1}{n} \sum_{i=1}^n x_i y_i - \rho \right| > \epsilon/6 \right) \leq 2 \exp\{-c(B)n\epsilon^2\} \end{aligned}$$



with  $c(B) = (72B^2)^{-1} \min(1, B^{-2})$ . If  $\epsilon < 1$  and

$$\left| \frac{1}{n} \sum_{i=1}^n x_i \right|, \quad \left| \frac{1}{n} \sum_{i=1}^n y_i \right|, \quad \left| \frac{1}{n} \sum_{i=1}^n x_i^2 - 1 \right|, \quad \left| \frac{1}{n} \sum_{i=1}^n y_i^2 - 1 \right|, \quad \left| \frac{1}{n} \sum_{i=1}^n x_i y_i - \rho \right| \leq \epsilon/6,$$

we have

$$\begin{aligned} |\hat{\sigma}^2 - 1 + \rho^2| &\leq \left| 1 - \frac{1}{n} \sum_{i=1}^n y_i^2 \right| + \left| \frac{1}{n} \sum_{i=1}^n y_i \right|^2 + \frac{|\frac{1}{n} \sum_{i=1}^n x_i^2 - (\frac{1}{n} \sum_{i=1}^n x_i)^2 - 1| \rho^2}{|\frac{1}{n} \sum_{i=1}^n x_i^2 - (\frac{1}{n} \sum_{i=1}^n x_i)^2|} \\ &\quad + \frac{|\{\frac{1}{n} \sum_{i=1}^n x_i y_i - (\frac{1}{n} \sum_{i=1}^n x_i)(\frac{1}{n} \sum_{i=1}^n y_i)\}^2 - \rho^2|}{|\frac{1}{n} \sum_{i=1}^n x_i^2 - (\frac{1}{n} \sum_{i=1}^n x_i)^2|} \\ &\leq \frac{4(\epsilon/6 + \epsilon^2/36)}{1 - \epsilon/6 - \epsilon^2/36} < \epsilon. \end{aligned}$$

So  $\text{pr}(|\hat{\sigma}^2 - 1 - \rho^2| > \epsilon) \leq 10 \exp\{-c(B)n\epsilon^2\}$ . For general cases, define

$$X' = \frac{X - E(X)}{\text{sd}(X)}, \quad Y' = \frac{Y - E(Y)}{\text{sd}(Y)}.$$

Then  $E(X') = E(Y') = 0$ ,  $\text{var}(X') = \text{var}(Y') = 1$  and  $|X'|, |Y'| < 2bB$ . Thus,

$$\begin{aligned} &\text{pr} \left[ \left| \hat{\sigma}^2 - \left\{ \text{var}(Y) - \frac{\text{cov}^2(X, Y)}{\text{var}(X)} \right\} \right| > \epsilon \right] \\ &= \text{pr} \left[ \left| \hat{\sigma}^2 - \{1 - \text{cov}^2(X', Y')\} \right| > \frac{\epsilon}{\text{var}(Y)} \right] \\ &\leq 10 \exp\left\{-\frac{c(2bB)}{\text{var}(Y)^2} n \epsilon^2\right\} = 10 \exp\{-C(B, b)n\epsilon^2\} \end{aligned}$$

with  $C(B, b) = (288b^2B^4)^{-1} \min\{1, (4b^2B^2)^{-1}\}$ .  $\square$

*Proof of Theorem 1.* We only need to prove that  $G_m^2(Y | X, \lambda_0)$  and  $G_t^2(Y | X, \lambda_0)$  are consistent estimators of  $G_{Y|X}^2$ . If so, by switching  $X$  and  $Y$ , we must have that  $G_m^2(X | Y, \lambda_0)$  and  $G_t^2(X | Y, \lambda_0)$  are consistent estimators of  $G_{X|Y}^2$  which guarantees the consistency of  $G_m^2(\lambda_0)$  and  $G_t^2(\lambda_0)$ .

We first introduce some notations that will appear later. Suppose  $|X|, |Y| < B$ . Condition 1 shows that  $\nu_X(y) > b^{-2}$  almost surely. Let  $m = \lceil n^{1/2} \rceil$  be the minimum size of slices, and let  $s \in S$  denote a slice and  $p_s$  be the probability that an observation falls in  $s$ . Let  $E_s, \text{var}_s,$  and  $\text{cov}_s$  denote the mean, variance and covariance conditional on slice  $s$ . Finally, define

$$\sigma_s^2 = \text{var}_s(Y) - \frac{\text{cov}_s^2(X, Y)}{\text{var}_s(X)}.$$

Then by definition

$$\sigma_s^2 \geq \text{var}_s(Y) - \text{var}_s\{E(Y | X)\} = E_s\{\text{var}(Y | X)\} \geq \exp[E_s\{\log \text{var}(Y | X)\}] \geq b^{-2}.$$

For observations  $(x_i, y_i)$  ( $i = 1, \dots, n$ ), let  $\hat{\nu}^2$  be the estimated variance of  $Y$  and  $\hat{\sigma}_s^2$  be the residual variance after regressing  $Y$  on  $X$  in slice  $s$ . Besides, we use the following inequality

$$1 - x^{-1} < \log x < x - 1, \quad x > 0$$

throughout the proof.

Now we prove that  $G_m^2(Y | X, \lambda_0)$  is a consistent estimator for  $G_{Y|X}^2$ . Define

$$d_{Y|X} = \log \text{var}(Y) - E \{ \log \text{var}(Y | X) \},$$

so  $G_{Y|X}^2 = 1 - \exp(-d_{Y|X})$ . Because

$$G_m^2(Y | X) = 1 - \exp\left\{-\max_{S: m_S \geq m} D(Y | S, \lambda_0)\right\},$$

we only need to show the consistency of

$$D(Y | X, \lambda_0) = \max_{S: m_S \geq m} D(Y | S, \lambda_0).$$

We prove this in two steps:

**Step 1:** We show that there exists  $\eta(n) > 0$  and  $\eta(n) \rightarrow 0$  as  $n \rightarrow \infty$ , such that

$$\text{pr} \left\{ \limsup_{n \rightarrow \infty} D(Y | X, \lambda_0) < d_{Y|X} + \eta(n) \right\} = 1,$$

which means that  $D(Y | X, \lambda_0)$  is almost surely smaller than  $d_{Y|X}$ . Because for any slicing scheme  $S$ ,  $\log \text{var}(Y) - \sum_{s \in S} p_s \log \sigma_s^2 \leq d_{Y|X}$ , it is enough to show that there is  $\eta(n)$  such that

$$\text{pr} \left\{ \limsup_{n \rightarrow \infty} D(Y | S, \lambda_0) - \log \text{var}(Y) + \sum_{s \in S} p_s \log(\sigma_s^2) < \eta(n) \right\} = 1.$$

Let  $\delta(n) = \log(n)n^{-1/4}$ . By definition of  $D(Y | S, \lambda_0)$ , we have

$$\begin{aligned} & D(Y | S, \lambda_0) - \log \text{var}(Y) + \sum_{s \in S} p_s \log(\sigma_s^2) \\ & \leq \{ \log \hat{\nu}^2 - \log \text{var}(Y) \} + \sum_{s \in S} \left( p_s - \frac{n_s}{n} \right) \log \sigma_s^2 + \sum_{s \in S} \frac{n_s}{n} (\log \sigma_s^2 - \log \hat{\sigma}_s^2). \end{aligned}$$

First, we consider  $\log \hat{\nu}^2 - \log \text{var}(Y)$ . By Hoeffding's inequality, for  $0 < \epsilon < 2$ ,

$$\begin{aligned} & \text{pr} \{ |\hat{\nu}^2 - \text{var}(Y)| > \epsilon \} \\ & \leq \text{pr} \left[ \left| \frac{1}{n} \sum_{i=1}^n \{y_i - E(Y)\}^2 - \text{var}(Y) \right| > \epsilon/2 \right] + \text{pr} \left\{ \left| \frac{1}{n} \sum_{i=1}^n y_i - E(Y) \right| > \epsilon/2 \right\} \\ & \leq 4 \exp \left[ -n\epsilon^2 \min\{1, (4B^2)^{-1}\} (8B^2)^{-1} \right], \end{aligned}$$

we have

$$\begin{aligned} & \text{pr} \{ \log \hat{\nu}^2 - \log \text{var}(Y) > \delta(n) \} \\ & \leq \text{pr} \{ \hat{\nu}^2 - \text{var}(Y) > \text{var}(Y) \delta(n) \} \leq 4n^{-C_1 n^{1/2} \log n} \end{aligned} \quad (1)$$

with  $C_1 = \min\{1, (4B^2)^{-1}\} (8B^4B^2)^{-1}$ .

Second, we consider  $\sum_{s \in S} (p_s - n_s/n) \log \sigma_s^2$ . Let us define a new random variable  $Z$  and  $Z = \log \sigma_s^2$  if  $X$  is in slice  $s$ . Let  $z_i$  ( $i = 1, \dots, n$ ) be  $n$  independent observations of  $Z$ , then,

$$E(Z) = \sum_{s \in S} p_s \log \sigma_s^2, \quad \frac{1}{n} \sum_{i=1}^n z_i = \sum_{s \in S} \frac{n_s}{n} \log \sigma_s^2.$$

By Hoeffding's inequality and the fact that  $\sigma_s^2 \in [b^{-2}, B^2]$ ,

175

$$\text{pr} \left\{ \left| \sum_{s \in S} \left( p_s - \frac{n_s}{n} \right) \log \sigma_s^2 \right| > \delta(n) \right\} \leq 2n^{-C_2 n^{1/2} \log n} \quad (2)$$

with  $C_2 = \min(1/|\log B|, 1/|\log b|)^2/2$ .

Third, we focus on the difference between  $\log \hat{\sigma}_s^2$  and  $\log \sigma_s^2$ . Consider a slicing scheme  $Q_n$  of  $n^4$  slices such that an observation falls in each slice equally. Given  $n$  observations, the probability for any of the  $n^4$  slices containing more than one observations is smaller than

$$n^4 \{1 - (1 + n^{-3})(1 - n^{-4})^n\} \leq n^{-2}.$$

Then event

180

$$E_{1,n} = \{\text{each slice of } Q_n \text{ has at most one observation}\}$$

satisfies  $\text{pr}(\liminf_{n \rightarrow \infty} E_{1,n}) = 1$ . Thus, we only need to consider slicing schemes that are more refined than  $Q_n$ , denoted as  $S \preceq Q_n$ . Define the set of slices as

$$\Xi = \{s \mid \text{there exists } S \preceq Q_n \text{ such that } s \in S\}.$$

The set  $\Xi$  contains at most  $n^4(n^4 + 1)/2 = O(n^8)$  slices. Each slice  $s \in \Xi$  contains at least  $m$  observations. By Lemma 1, if  $\delta(n) < 0.5b^{-2}$ ,

$$\begin{aligned} & \text{pr} \{ \log \sigma_s^2 - \log \hat{\sigma}_s^2 > \delta(n) \} \\ & \leq P \{ \sigma_s^2 / \hat{\sigma}_s^2 - 1 > \delta(n) \} \\ & \leq \text{pr} \{ |\hat{\sigma}_s^2 - \sigma_s^2| > \delta(n) \} + P \{ |\hat{\sigma}_s^2 - \sigma_s^2| > \delta(n) \hat{\sigma}_s^2, |\hat{\sigma}_s^2 - \sigma_s^2| \leq \delta(n) \} \\ & \leq 20n^{-C_3 \log(n)}. \end{aligned} \quad (3)$$

with  $C_3 = C(B, b) \min\{1, (4b^4)^{-1}\}$ . Let  $\eta(n) = 3\delta(n)$  and event

185

$$E_{2,n} = \{ \max_{S \preceq Q_n} D(Y \mid S, \lambda_0) < d_{Y|X} + \eta(n) \}.$$

Combine the results of (1)–(3), we have  $\text{pr}(\liminf_{n \rightarrow \infty} E_{1,n} \cap E_{2,n}) = 1$ , which means that  $G_m^2(Y \mid X, \lambda_0)$  is almost surely smaller than  $G_{Y|X}^2$ .

**Step 2:** Next, we show that there exists  $\eta'(n) > 0$  and  $\eta'(n) \rightarrow 0$  as  $n \rightarrow \infty$ , such that

$$\text{pr} \left\{ \liminf_{n \rightarrow \infty} D(Y \mid X, \lambda_0) > d_{Y|X} - \eta'(n) \right\} = 1,$$

which means that  $D(Y \mid X, \lambda_0)$  is almost surely larger than  $d_{Y|X}$ . We just need to prove that for any sample size  $n$ , there exists a slicing scheme  $T_n$  such that

190

$$\text{pr} \left( \liminf_{n \rightarrow \infty} E_{3,n} \cap E_{4,n} \right) = 1,$$

where

$$E_{3,n} = \{\text{each slice of } T_n \text{ contains at least } m \text{ samples}\}$$

and

$$E_{4,n} = \{D(Y \mid T_n, \lambda_0) > d_{Y|X} - \eta'(n)\}.$$

Consider a slicing scheme  $T_n$  of  $\lfloor n^{1/4} \rfloor$  slices such that an observation falls in one slice equally. Then, we further divide each slice into  $\lfloor n^{1/2} \rfloor$  bins such that an observation falls in each

195 bin equally. Given  $n$  observations, the probability that each bin contains at least one observation is greater than

$$1 - \lfloor n^{1/4} \rfloor \lfloor n^{1/2} \rfloor (1 - n^{-3/4})^n > 1 - \lfloor n^{1/4} \rfloor \lfloor n^{1/2} \rfloor e^{-n^{1/4}},$$

so each slice of  $T_n$  contains at least  $m$  observations. Then,  $\text{pr}(\liminf_{n \rightarrow \infty} E_{3,n}) = 1$ . Define

$$\Delta_n(T_n) = \log \text{var}(Y) - \sum_{s \in T_n} p_s \log \text{var}_s(Y).$$

We first consider the difference between  $D(Y | T_n, \lambda_0) - \Delta_n(T_n)$ :

$$\begin{aligned} & D(Y | T_n, \lambda_0) - \Delta_n(T_n) \\ & \geq \{\log \hat{\nu}^2 - \log \text{var}(Y)\} + \sum_{s \in T_n} \left(p_s - \frac{n_s}{n}\right) \log \text{var}_s(Y) + \sum_{s \in T_n} \frac{n_s}{n} \{\log \text{var}_s(Y) - \log \hat{\sigma}_s^2\} \\ & \quad - \lambda_0 n^{-3/4} \log n. \end{aligned}$$

Similar as (1), if  $\delta(n) < 0.5b^{-2}$ ,

$$\begin{aligned} & \text{pr} \left\{ \log \hat{\nu}^2 - \log \text{var}(Y) < -\delta(n) \right\} \\ & \leq \text{pr} \left\{ 1 - \text{var}(Y)/\hat{\nu}^2 < -\delta(n) \right\} \\ & \leq \text{pr} \left\{ |\hat{\nu}^2 - \text{var}(Y)| > \delta(n) \right\} + P \left\{ |\hat{\nu}^2 - \text{var}(Y)| > \delta(n)\hat{\nu}^2, |\hat{\nu}^2 - \text{var}(Y)| \leq \delta(n) \right\} \\ & \leq 4n^{-C_4 n^{1/2} \log n} \end{aligned} \tag{4}$$

200 with  $C_4 = (8B^2)^{-1} \min\{1, (4B^2)^{-1}\} \min\{1, (4b^4)^{-1}\}$ . Similar as (2), we have

$$\text{pr} \left\{ \left| \sum_{s \in S} \left(p_s - \frac{n_s}{n}\right) \log \text{var}_s(Y) \right| > \delta(n) \right\} \leq 2n^{-C_2 n^{1/2} \log n}. \tag{5}$$

Besides,  $\text{var}_s(Y) \geq \sigma_s^2$  and

$$\begin{aligned} & \text{pr} \left\{ \log \text{var}_s(Y) - \log \hat{\sigma}_s^2 < -\delta(n) \right\} \\ & \leq \text{pr} \left\{ \log \sigma_s^2 - \log \hat{\sigma}_s^2 < -\delta(n) \right\} \\ & \leq \text{pr} \left\{ 1 - \hat{\sigma}_s^2/\sigma_s^2 < -\delta(n) \right\} \\ & \leq \text{pr} \left\{ |\hat{\sigma}_s^2 - \sigma_s^2| \geq b^{-2}\delta(n) \right\} \leq 10n^{-C(B,b)b^{-4} \log(n)}. \end{aligned} \tag{6}$$

Now, define  $\delta_1(n) = 3\delta(n) + \lambda_0 \log(n)n^{-3/4}$  and event

$$E_{5,n} = \{D(Y | T_n, \lambda_0) > \Delta_n(T_n) - \delta_1(n)\}.$$

By (4)–(6),  $\text{pr}(\liminf_{n \rightarrow \infty} E_{3,n} \cap E_{5,n}) = 1$ .

The only problem left is how to control the difference between  $\Delta_n(T_n)$  and  $d_{Y|X}$ , which is

$$\Delta_n(T_n) - d_{Y|X} = \sum_{s \in T_n} p_s \left\{ \frac{1}{p_s} \int_s \log \nu_Y^2(x) f_X(x) dx - \log \text{var}_s(Y) \right\}.$$

205 Denote the probability density function of  $X$  as  $f_X(x)$ . For one slice  $s$ , because  $X$  is a continuous random variable, set

$$\frac{1}{p_s} \int_s \mu_Y(x) f_X(x) dx = \mu_Y(x'_s), \quad \frac{1}{p_s} \int_s \log \nu_Y^2(x) f_X(x) dx = \log \nu_Y^2(x''_s),$$

where  $x'_s$  and  $x''_s$  lie in the slice almost surely. Then

$$\begin{aligned}
& \log \nu_Y^2(x''_s) - \log \text{var}_s(Y) \\
&= \log \nu_Y^2(x''_s) - \log \left[ \frac{1}{p_s} \int_s \nu_Y^2(x) f_X(x) dx + \frac{1}{p_s} \int_s \{ \mu_Y(x) - \mu_Y(x'_s) \}^2 f_X(x) dx \right] \\
&= \log \nu_Y^2(x''_s) - \log \left[ \nu_Y^2(x''_s) + \frac{1}{p_s} \int_s \int_{x''_s}^x 2\nu_Y(z) \nu'_Y(z) dz f_X(x) dx \right. \\
&\quad \left. + \frac{1}{p_s} \int_s \left\{ \int_{x'_s}^x \mu'_Y(z) dz \right\}^2 f_X(x) dx \right] \\
&\geq \log \nu_Y^2(x''_s) - \log \left[ \nu_Y^2(x''_s) + \int_s 2\nu_Y(x) |\nu'_Y(x)| dx + \left\{ \int_s |\mu'_Y(x)| dx \right\}^2 \right].
\end{aligned}$$

According to Condition 3, we have

$$\begin{aligned}
& \log \nu_Y^2(x''_s) - \log \text{var}_s(Y) \\
&\geq \log \nu_Y^2(x''_s) - \log \left\{ \nu_Y^2(x''_s) + 2C \int_s \nu_Y^2(x) dx + C^2 \int_s 1 dx \int_s \nu_Y^2(x) dx \right\} \\
&\geq - \frac{\int_s \nu_Y^2(x) dx (2C + C^2 \int_s 1 dx)}{\nu_Y^2(x''_s)} \\
&\geq -2b^2 B^2 C (1 + BC) \int_s 1 dx.
\end{aligned}$$

Then, we can conclude

$$\begin{aligned}
\Delta_n(T_n) - d_{Y|X} &\geq -2p_s b^2 B^2 C (1 + BC) \sum_{s \in T_n} \int_s 1 dx \\
&\geq -4 \lfloor n^{1/4} \rfloor^{-1} (1 + BC) C b^2 B^3 = -\delta_2(n).
\end{aligned}$$

Therefore, let  $\eta'(n) = \delta_1(n) + \delta_2(n)$ , we have  $\text{pr}(\liminf_{n \rightarrow \infty} E_{3,n} \cap E_{4,n}) = 1$ , which means  $G_m^2(Y | X, \lambda_0)$  is almost surely larger than  $G_{Y|X}^2$ . By Steps 1 and 2, we can conclude that  $G_m^2(Y | X, \lambda_0)$  is a consistent estimator of  $G_{Y|X}^2$ . 210

To prove the consistency of  $G_t^2(Y | X, \lambda)$ , we introduce a new quantity  $Z(\lambda_0) = \sum_{S: m_S \geq m} n^{-\lambda_0(|S|-1)/2}$ ;  $Z(\lambda_0)$  is bounded by 1 and  $(1 + n^{-\lambda_0/2})^n$ . By definition of  $G_m^2(Y | X, \lambda_0)$  and  $G_t^2(Y | X, \lambda_0)$ , we have 215

$$\begin{aligned}
\{1 - G_t^2(Y | X, \lambda_0)\}^{-n/2} &= Z(\lambda_0)^{-1} \sum_{S: m_S \geq m} \exp\left\{\frac{n}{2} D(Y | S, \lambda_0)\right\} \\
&\geq Z(\lambda_0)^{-1} \exp\left\{\frac{n}{2} D(Y | X, \lambda_0)\right\}, \\
\{1 - G_t^2(Y | X, \lambda_0)\}^{-n/2} &\leq Z(\lambda_0)^{-1} \sum_{S: m_S \geq m} \exp\left\{\frac{n}{2} D(Y | S, \frac{\lambda_0}{2}) - \frac{\lambda_0}{4} (|S| - 1) \log(n)\right\} \\
&\leq Z(\lambda_0)^{-1} Z\left(\frac{\lambda_0}{2}\right) \exp\left\{\frac{n}{2} D(Y | X, \frac{\lambda_0}{2})\right\}.
\end{aligned}$$

By the consistency of  $D(Y | X, \lambda_0)$  and  $D(Y | X, \lambda_0/2)$ , we prove that  $G_t^2(Y | X, \lambda_0)$  is a consistent estimator of  $G_{Y|X}^2$ . □

5.2. *Consistency of  $G_m^2$  and  $G_t^2$  with empirical Bayes selection of  $\lambda_0$*

Suppose  $\lambda^*$  is the optimal  $\lambda_0$  that maximizes  $\text{BF}(\lambda_0)$  from a range  $[\lambda_1, \lambda_2]$  with  $\lambda_1 > 0$ . Then  
 220  $Z(\lambda_2) \leq Z(\lambda^*) \leq Z(\lambda_1)$  and

$$\begin{aligned}
 G_m^2(Y | X, \lambda^*) &\leq G_m^2(Y | X, \lambda_1), \\
 \{1 - G_m^2(Y | X, \lambda^*)\}^{-n/2} &= \exp\left\{\frac{n}{2}D(Y | X, \lambda^*)\right\} \\
 &\geq Z(\lambda_2)^{-1} \sum_{S: m_S \geq m} \exp\left\{\frac{n}{2}D(Y | S, \lambda^* + \lambda_2)\right\} \\
 &\geq Z(\lambda_2)^{-1} \{1 - G_m^2(Y | X, 2\lambda_2)\}^{-n/2}, \\
 \{1 - G_t^2(Y | X, \lambda^*)\}^{-n/2} &= Z(\lambda^*)^{-1} \sum_{S: m_S \geq m} \exp\left\{\frac{n}{2}D(Y | S, \lambda^*)\right\} \\
 &\geq Z(\lambda_1)^{-1} \{1 - G_m^2(Y | X, \lambda_2)\}^{-n/2}, \\
 \{1 - G_t^2(Y | X, \lambda^*)\}^{-n/2} &\leq Z(\lambda^*)^{-1} \sum_{S: m_S \geq m} \exp\left\{\frac{n}{2}D(Y | S, \lambda_1)\right\} \\
 &\leq Z(\lambda_2)^{-1} Z(\lambda_1) \{1 - G_t^2(Y | X, \lambda_1)\}^{-n/2}.
 \end{aligned}$$

By the consistency of  $G_m^2(Y | X, \lambda_1)$ ,  $G_m^2(Y | X, 2\lambda_2)$ ,  $G_m^2(Y | X, \lambda_2)$  and  $G_t^2(Y | X, \lambda_1)$ , we conclude that  $G_m^2(Y | X, \lambda^*)$  and  $G_t^2(Y | X, \lambda^*)$  are consistent estimators. Then the estimators with data-driven  $\lambda_0$  are consistent.

5.3. *Proof of Theorem 2 - Equivalence between  $G_m^2$  and  $R^2$*

225 The following lemma is needed for the main theorem.

LEMMA 2. *Let  $(p_1, p_2, p_3) \sim \text{Dir}(k_1, k_2, 2)$  and*

$$\Lambda(q, p) = (k_1 - 1) \log \frac{q_1}{p_1} + (k_2 - 1) \log \frac{q_2}{p_2}.$$

Then for any  $k_1, k_2 \geq 3$ ,  $q_1, q_2 > 0$ ,  $q_1 + q_2 = 1$  and function  $\delta(p) > 0$ ,

$$\text{pr} \{\Lambda(q, p) \geq \delta(p)\} \leq (k_1 + k_2)^3 \int_0^1 e^{-\delta(p)} dp.$$

*Proof of Lemma 2.* By definition, we have

$$p_1^{k_1-1} p_2^{k_2-1} (1 - p_1 - p_2) \leq q_1^{k_1-1} q_2^{k_2-1} e^{-\Lambda(q,p)},$$

so that

$$\begin{aligned}
 &\text{pr} \{\Lambda(q, p) \geq \delta(p)\} \\
 &= \frac{(k_1 + k_2 + 1)!}{(k_1 - 1)!(k_2 - 1)!} \int_{\Lambda(q,p) \geq \delta(p)} p_1^{k_1-1} p_2^{k_2-1} (1 - p_1 - p_2) dp_1 dp_2 \\
 &\leq \frac{(k_1 + k_2 + 1)!}{(k_1 - 1)!(k_2 - 1)!} q_1^{k_1-1} q_2^{k_2-1} \int_{\Lambda(q,p) \geq \delta(p)} e^{-\Lambda(q,p)} dp_1 dp_2 \\
 &\leq (k_1 + k_2)^3 \frac{(k_1 + k_2 - 2)!}{(k_1 - 1)!(k_2 - 1)!} q_1^{k_1-1} q_2^{k_2-1} \int_{\Lambda(q,p) \geq \delta(p)} e^{-\Lambda(q,p)} dp_1 dp_2 \\
 &\leq (k_1 + k_2)^3 \int_0^1 e^{-\delta(p)} dp. \quad \square
 \end{aligned}$$

*Proof of Theorem 2.* If the slice scheme on  $X$  has only one slice, we have

230

$$D(Y | S, \lambda_0) = \log \hat{\nu}^2 - \log \hat{\sigma}^2 = -\log(1 - R^2),$$

where  $\hat{\sigma}^2$  is the residual variance after regressing  $Y$  on  $X$ . Intuitively, if  $Y$  and  $X$  follow a bivariate normal, the optimal slice scheme is only one slice in each direction. Now, we show that

$$\text{pr} \{D(Y | X, \lambda_0) + \log(1 - R^2) > 0\} < 1.5n^{-\lambda_0/3+5}.$$

For any slice scheme  $S$ ,

$$D(Y | S, \lambda_0) + \log(1 - R^2) = \log \hat{\sigma}^2 - \sum_{s \in S} \frac{n_s}{n} \log(\hat{\sigma}_s^2) - \frac{\lambda_0}{n} (|S| - 1) \log n.$$

Without loss of generality, we assume that  $\text{var}(Y) = 1$  and  $x_1 < \dots < x_n$ . Suppose the connected slices each has  $n_i$  ( $i = 1, \dots, |S|$ ) observations. For  $1 \leq j < k \leq n$ , define

235

$$\Delta(j, k, \lambda_0) = \frac{k}{n} \log\{\hat{\sigma}^{(k)}\}^2 - \frac{j}{n} \log\{\hat{\sigma}^{(j)}\}^2 - \frac{k-j}{n} \log\{\hat{\sigma}^{(k,j)}\}^2 - \frac{\lambda_0}{n} \log n.$$

Here,  $\{\hat{\sigma}^{(j)}\}^2$  is the residual variance of regressing  $y_i$  on  $x_i$  ( $i = 1, \dots, j$ ),  $\{\hat{\sigma}^{(k)}\}^2$  is the residual variance of regressing  $y_i$  on  $x_i$  ( $i = 1, \dots, k$ ) and  $\{\hat{\sigma}^{(k,j)}\}^2$  is the residual variance of regressing  $y_i$  on  $x_i$  ( $i = j+1, \dots, k$ ). For given  $j, k$ , let

$$p_1 = \frac{j\{\hat{\sigma}^{(j)}\}^2}{k\{\hat{\sigma}^{(k)}\}^2}, \quad p_2 = \frac{(k-j)\{\hat{\sigma}^{(k,j)}\}^2}{k\{\hat{\sigma}^{(k)}\}^2}, \quad q_1 = \frac{j}{k}, \quad q_2 = 1 - q_1.$$

Then according to Cochran's theorem, we have

$$(p_1, p_2, 1 - p_1 - p_2) \sim \text{Dir}(j-2, k-j-2, 2),$$

$$n\Delta(j, k, \lambda_0) = \Lambda(q, p) - \lambda_0 \log(n) + 3 \log(q_1/p_1) + 3 \log(q_2/p_2).$$

By Lemma 2 we have

240

$$\text{pr} \{\Lambda(q, p) > \lambda_0 \log(n)/3\} \leq k^3 n^{-\lambda_0/3} \leq n^{-\lambda_0/3+3}.$$

At the same time,

$$\begin{aligned} & \text{pr} \{3 \log(q_1/p_1) > \lambda_0 \log(n)/3\} \\ &= \frac{(k-3)!}{(j-3)!(k-j-1)!} \int_0^{q_1 n^{-\lambda_0/9}} p^{j-3} (1-p)^{k-j-1} dp \\ &\leq \frac{(k-3)!}{(j-3)!(k-j-1)!} \frac{1}{j-2} (q_1 n^{-\lambda_0/9})^{j-2} \\ &= (j/k)^{j-2} \frac{(k-3)!}{(j-2)!(k-j-1)!} \frac{1}{n^{\lambda_0(j-2)/9}} \leq \frac{1}{n^{(j-2)(\lambda_0/9-1)}} \end{aligned}$$

If  $n \geq 25$ , we have  $\text{pr} \{\Delta(j, k, \lambda_0) > 0\} \leq 3n^{-\lambda_0/3+3}$ . On the other hand, for any slicing scheme with  $|S| \geq 2$ ,  $D(Y | S, \lambda_0) + \log(1 - R^2)$  equals

$$\sum_{h=1}^{|S|-1} \Delta\left(\sum_{l=1}^h n_l, \sum_{l=1}^{h+1} n_l, \lambda_0\right)$$

So

$$\begin{aligned}
& \text{pr} \{D(Y | X, \lambda_0) + \log(1 - R^2) > 0\} \\
& \leq \text{pr} \left\{ \max_{m \leq j < k \leq n-m} \Delta(j, k, \lambda_0) > 0 \right\} \\
& \leq \sum_{m \leq j < k \leq n-m} \text{pr} \{ \Delta(j, k, \lambda_0) > 0 \} < 1.5n^{-\lambda_0/3+5}.
\end{aligned}$$

<sup>245</sup> Since  $X$  and  $Y$  are symmetric, the result tells us that  $P \{G_m^2(\lambda_0) = R^2\} > 1 - 3n^{-\lambda_0/3+5}$ .  
When  $\lambda_0 > 18$ , we have  $G_m^2(\lambda_0) = R^2$  almost surely.  $\square$

#### REFERENCES

- HELLER, R., HELLER, Y., KAUFMAN, S., BRILL, B. & GORFINE, M. (2016). Consistent distribution-free  $K$ -sample and independence tests for univariate random variables. *Journal of Machine Learning Research*, **17**, 1–54.
- <sup>250</sup> RESHEF, D. N., RESHEF, Y. A., FINUCANE, H. K., GROSSMAN, S. R., MCVEAN, G., TURNBAUGH, P. J., LANDER, E. S., MITZENMACHER, M. & SABETI, P. S. (2011). Detecting Novel Associations in Large Data Sets. *Science* **334**, 1518–1524.



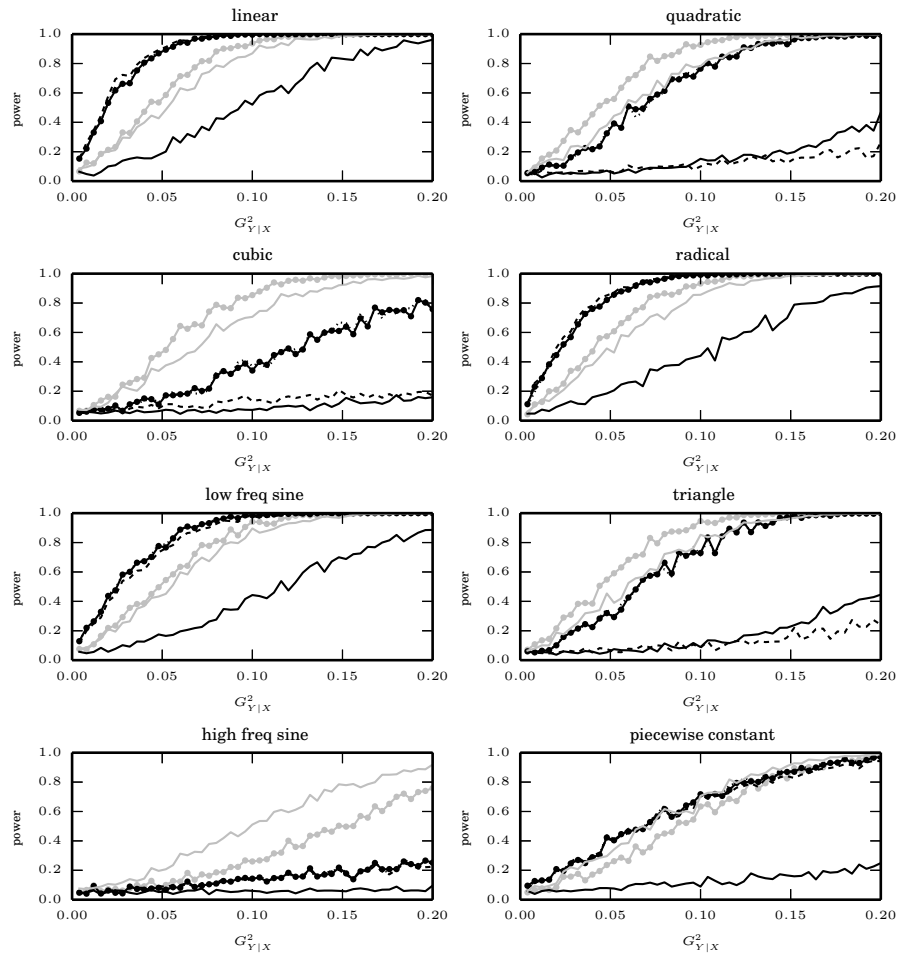

Fig. 5. The powers of mutual information (black solid),  $MIC_e$  (grey solid), alternating conditional expectation (grey markers), characteristic function (black dashes), Genest's test (black dots) and Hoeffding's test (black markers) for independence test between  $X$  and  $Y$  when the function relationships are linear, quadratic, cubic, radical, low freq sine, triangle, high freq sine and piecewise constant. The x-axis is  $G^2_{Y|X}$  and the y-axis is the power.

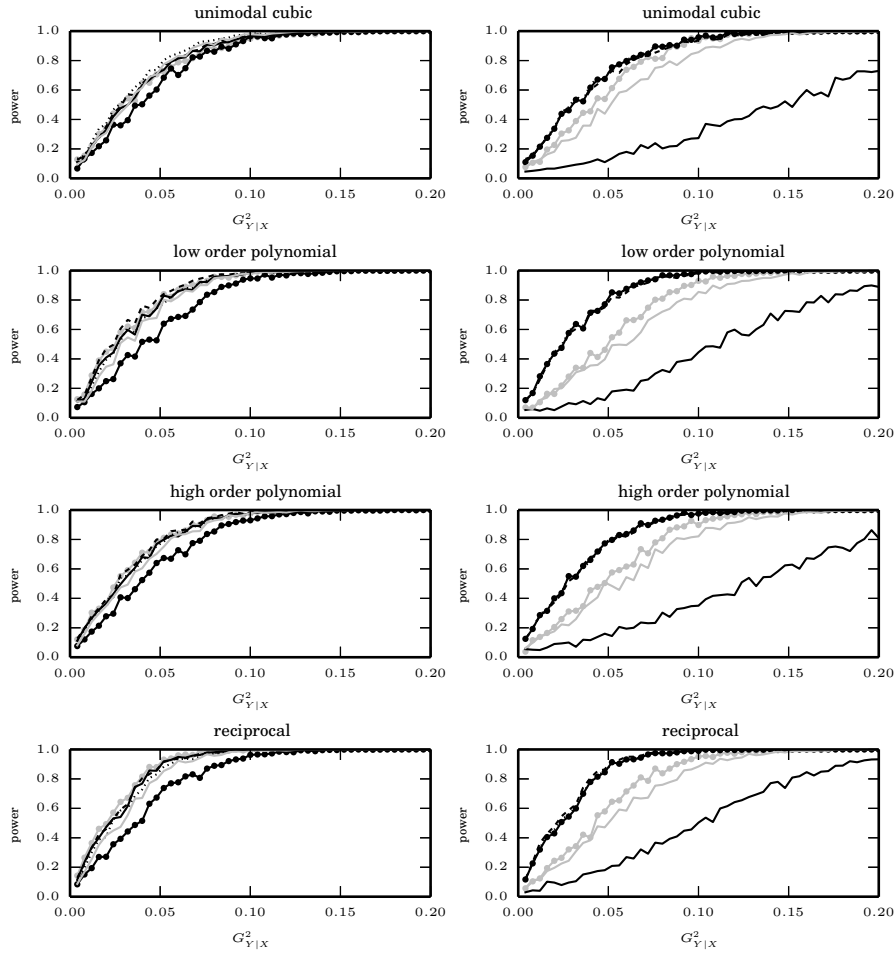

Fig. 6. The left column presents the powers of  $G_m^2$  (black solid),  $G_t^2$  (grey solid), Pearson correlation (grey markers), distance correlation (black dashes), the method of Heller et al. (2016) (black dots) and  $TIC_e$  (black markers) for independence test between  $X$  and  $Y$  when the function relationships are power functions; the right column presents the powers of mutual information (black solid),  $MIC_e$  (grey solid), alternating conditional expectation (grey markers), characteristic function (black dashes), Genest's test (black dots) and Hoeffding's test (black markers). The x-axis is  $G_{Y|X}^2$  and the y-axis is the power.

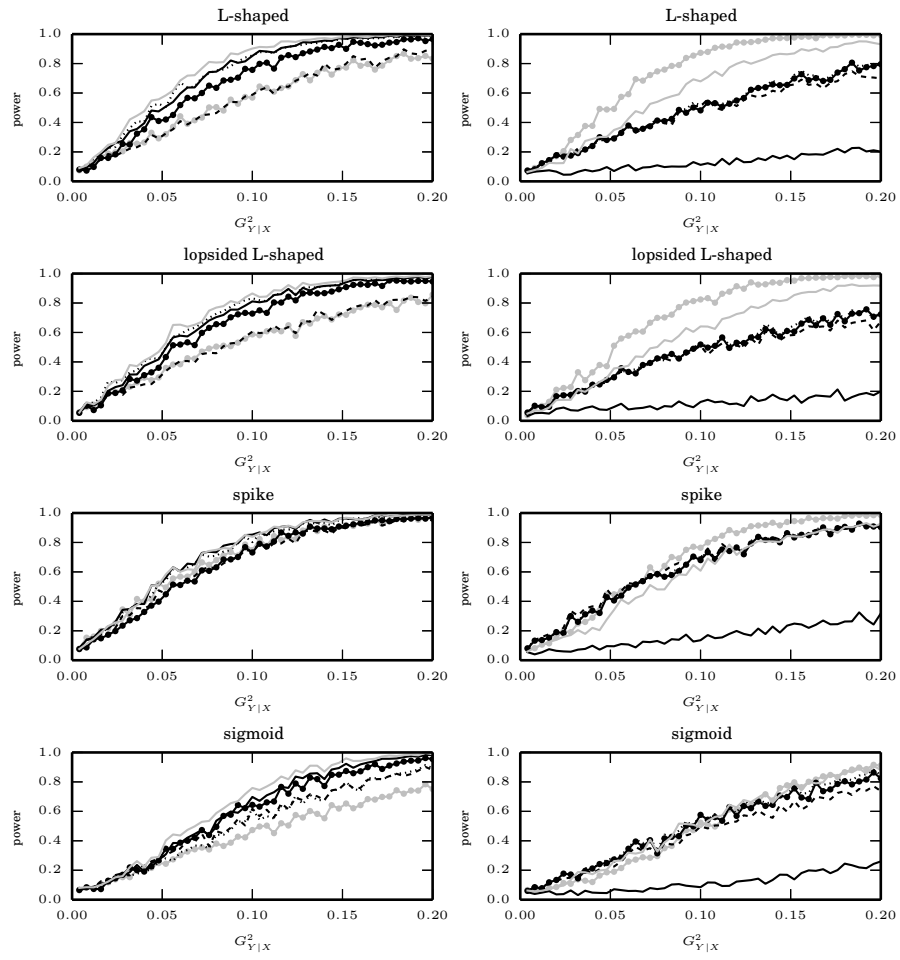

Fig. 7. The powers for independence test between  $X$  and  $Y$  when the function relationship are piecewise linear functions.

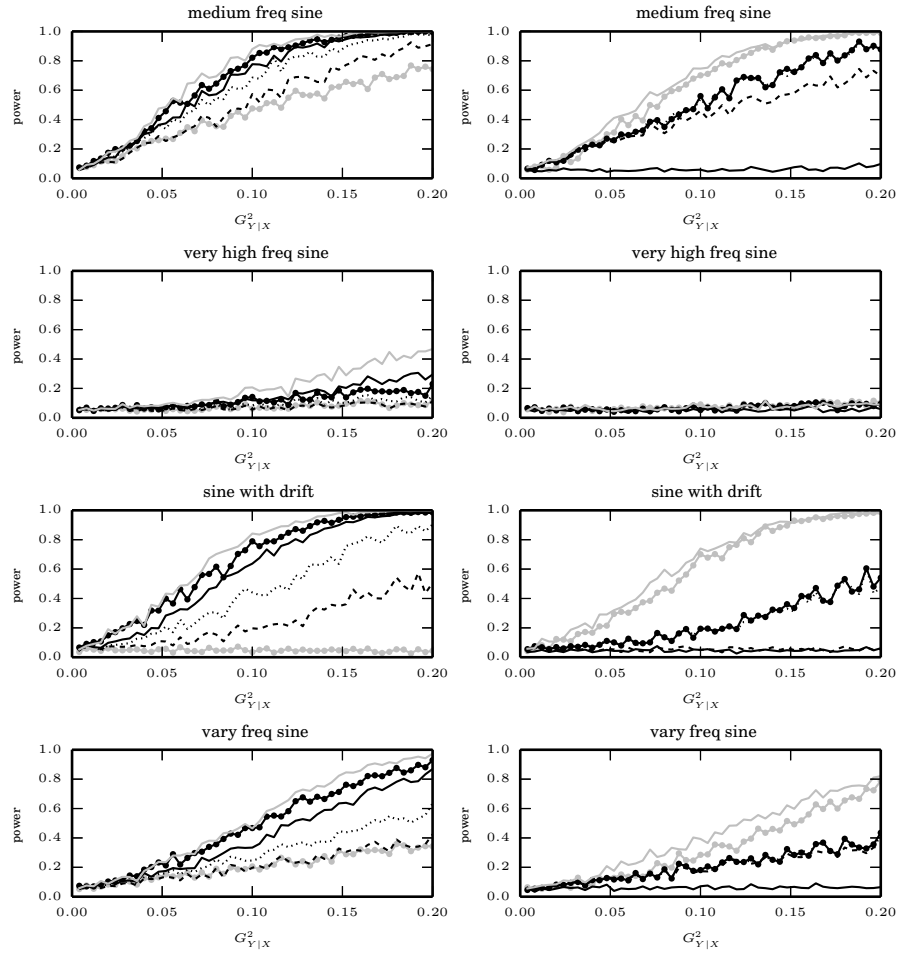

Fig. 8. The powers for independence test between  $X$  and  $Y$  when the function relationships are trigonometric functions.

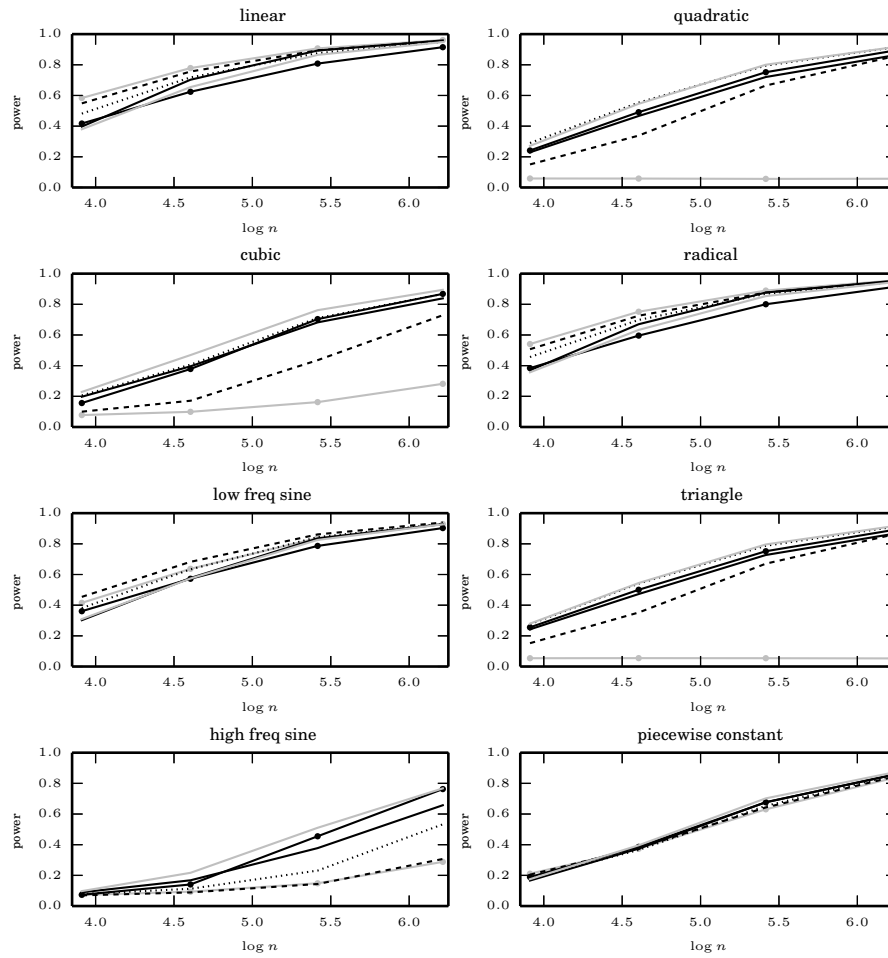

Fig. 9. The average powers of  $G_m^2$  (black solid),  $G_t^2$  (grey solid), Pearson correlation (grey markers), distance correlation (black dashes), the method of Heller et al. (2016) (black dots) and  $TIC_e$  (black markers) for testing independence between  $X$  and  $Y$  with  $n = 50, 100, 225$  and  $500$ . The underlying true functional relationships are linear, quadratic, cubic, radical, low freq sine, triangle, high freq sine and piecewise constant. The x-axis is logarithm of  $n$  with base 10 and the y-axis is the average power.

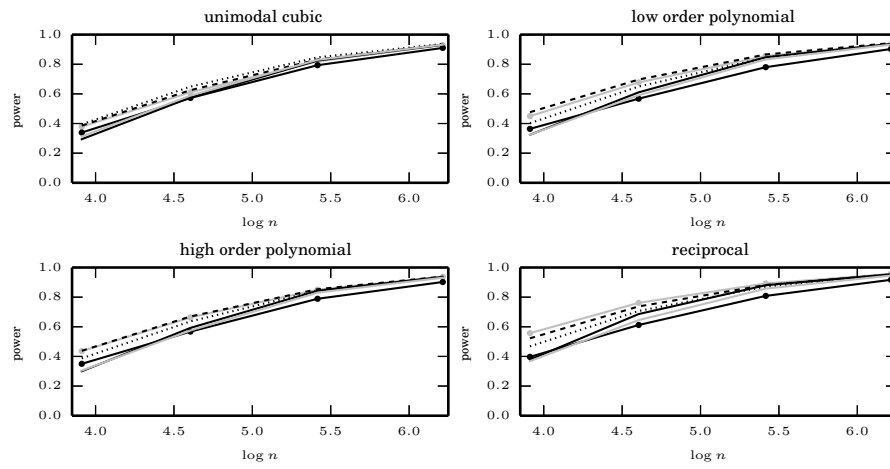

Fig. 10. The average powers for independence test between  $X$  and  $Y$  when the function relationships are power functions.

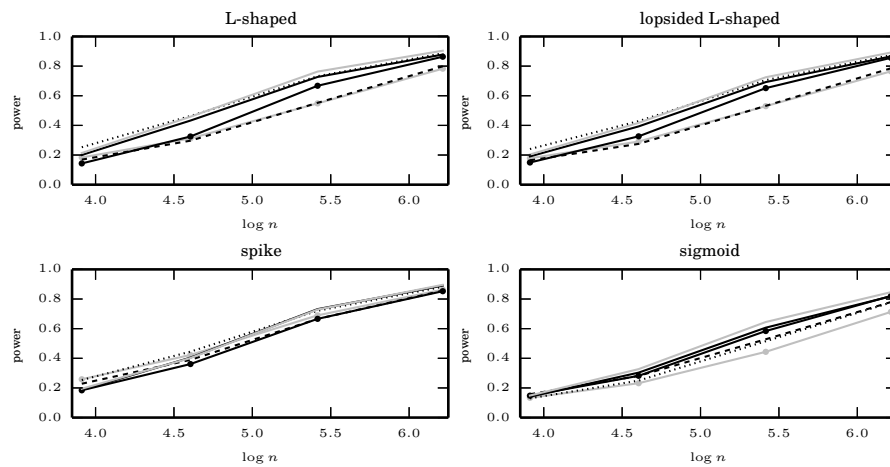

Fig. 11. The average powers for independence test between  $X$  and  $Y$  when the function relationships are piecewise linear functions.

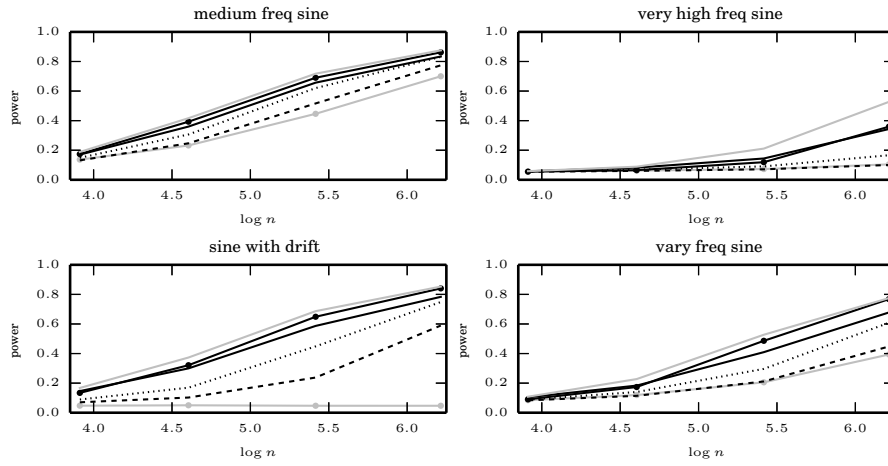

Fig. 12. The average powers for independence test between  $X$  and  $Y$  when the function relationships are trigonometric functions.

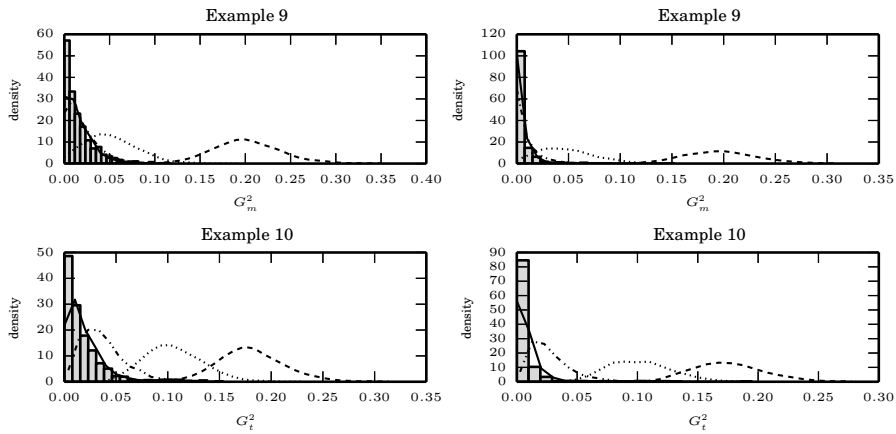

Fig. 13. Sampling distributions of  $G_m^2$  and  $G_t^2$  under the two models in Section 4.4 with  $G_{Y|X}^2 = 0.01$  and  $\lambda_0 = 0.5$  (dashes), 1.5 (dots), 2.5 (dot-dash) and 3.5 (solid). The density function in each case was estimated by the histogram. The sampling distributions of  $G_m^2$  and  $G_t^2$  with empirical Bayes selection of  $\lambda_0$  were in gray shadow and overlaid on top of other density functions.
